# Supplementary material for: Highly sensitive detection of copper ions by densely grafting fluorescein inside polyethyleneimine core–silica shell nanoparticles
Source: Royal Society of Chemistry journal article supplement (doi:10.1039/c5an01880c), 2015-01-01
Supplement: c5an01880c1.pdf [file c5an01880c1.pdf]

## Supporting Information

### Highly Sensitive Detecting Copper Ion by Densely Grafting Fluorescein inside the Polyethyleneimine Core-Silica Shell Nanoparticles

Yali Qiao and Xingwang Zheng\*<sup>1</sup>

*Key Laboratory of Analytical Chemistry for Life Science of Shaanxi Province, School of  
Chemistry & Chemical Engineering, Shaanxi Normal University, Xi'an 710062, P. R. China*

Tab. S1 TEM image of SPNPs with different Hydrolysis time

| hydrolysis<br>time<br>(h) | 6                                                                                   | 12                                                                                  | 18                                                                                   | 24                                                                                    | 30                                                                                    |
|---------------------------|-------------------------------------------------------------------------------------|-------------------------------------------------------------------------------------|--------------------------------------------------------------------------------------|---------------------------------------------------------------------------------------|---------------------------------------------------------------------------------------|
| TEM<br>image              | 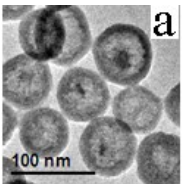 |  |  |  |  |

Tab. S2 Linear equations of the FSPNPs response to Cu<sup>2+</sup> in 10 mM pH 9.0  
Na<sub>2</sub>CO<sub>3</sub>-NaHCO<sub>3</sub> buffer

| concn range of Cu <sup>2+</sup> /M            | linear equation                   | R      |
|-----------------------------------------------|-----------------------------------|--------|
| $1.0 \times 10^{-10} \sim 1.0 \times 10^{-9}$ | $y = 4.304 \times 10^8 x + 1.065$ | 0.9990 |
| $1.0 \times 10^{-9} \sim 1.0 \times 10^{-8}$  | $y = 2.734 \times 10^8 x + 1.231$ | 0.9893 |

Corresponding author. Fax: +86 29 81530727.

E-mail addresses: zhengxw@snnu.edu.cn

Tab. S3 Detection of Cu<sup>2+</sup> in HCT-116 colorectal cancer cells samples and in tap-water samples

| sample | Cu <sup>2+</sup> added (nM) | Cu <sup>2+</sup> detected (nM) | recovery (%) |
|--------|-----------------------------|--------------------------------|--------------|
| (a)    | 5.0                         | 4.9                            | 98           |
|        | 7.0                         | 6.8                            | 97           |
| (b)    | 0                           | 0.62                           |              |
|        | 0.10                        | 0.74                           | 103          |
|        | 0.30                        | 0.87                           | 95           |

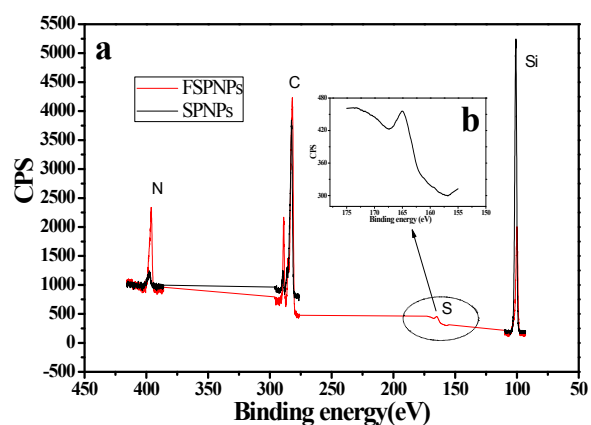

Fig. S1 (a) XPS of C, Si, N and S elements of SPNPs (black) and FSPNPs (red). (b) XPS of S element of FSPNPs.

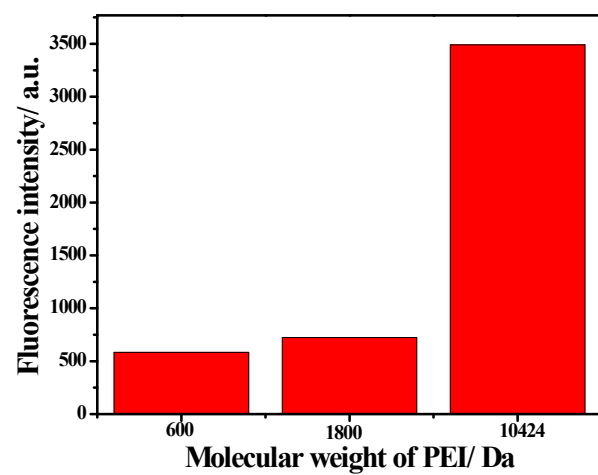

Fig. S2 Effect of the molecular weight of PEI on the loading density of FITC on silica nanoparticles. The concentration of PEI was 0.1g/mL.

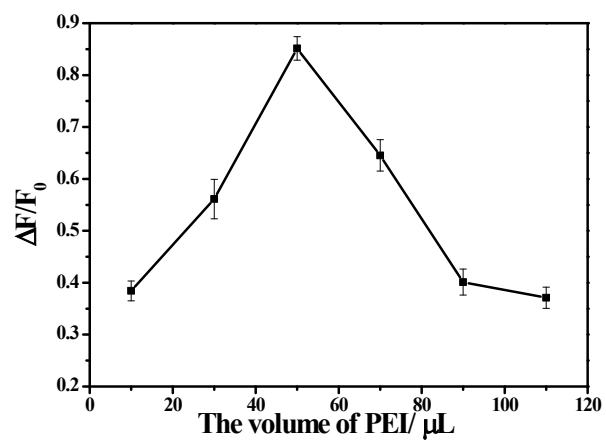

Fig. S3 Effect of the dosage of PEI on the  $\text{Cu}^{2+}$  ( $10^{-6}$  M) quenching efficiency. The concentration of PEI was 0.1g/mL.
